# Supplementary material
Source: PubMed Central journal article supplement (PMC4135748)
Supplement: AEM.01403-14_zam999105577so1.pdf [file AEM.01403-14_zam999105577so1.pdf]

Probematch search was restricted to region relative to positions in E. coli: 300 to 850  
 RDP Release 11, Update 1 :: October 2013

| Taxonomic group                  | Number of sequences | DegePrime |       |       |      | EMP  |      |
|----------------------------------|---------------------|-----------|-------|-------|------|------|------|
|                                  |                     | 341F      | 341'F | 515'F | 805R | 515F | 806R |
| domain Bacteria                  | 1534872             | 0.96      | 0.93  | 0.93  | 0.90 | 0.93 | 0.91 |
| phylum "Actinobacteria"          | 204784              | 0.97      | 0.97  | 0.72  | 0.71 | 0.72 | 0.71 |
| phylum "Aquificae"               | 1279                | 0.97      | 0.97  | 0.97  | 0.95 | 0.97 | 0.95 |
| phylum "Bacteroidetes"           | 182923              | 0.97      | 0.97  | 0.97  | 0.96 | 0.97 | 0.95 |
| phylum "Caldiserica"             | 263                 | 0.98      | 0.98  | 0.00  | 0.97 | 0.00 | 0.95 |
| phylum "Chlamydiae"              | 563                 | 0.76      | 0.01  | 0.01  | 0.96 | 0.01 | 0.96 |
| phylum "Chlorobi"                | 1531                | 0.95      | 0.95  | 0.62  | 0.95 | 0.62 | 0.95 |
| phylum "Chloroflexi"             | 25804               | 0.89      | 0.76  | 0.96  | 0.35 | 0.96 | 0.59 |
| phylum "Chrysiogenetes"          | 13                  | 0.85      | 0.85  | 1.00  | 1.00 | 1.00 | 1.00 |
| phylum "Deferribacteres"         | 734                 | 0.99      | 0.99  | 0.98  | 0.96 | 0.98 | 0.93 |
| phylum "Deinococcus-Thermus"     | 2556                | 0.97      | 0.97  | 0.98  | 0.97 | 0.98 | 0.97 |
| phylum "Dictyoglomi"             | 36                  | 1.00      | 1.00  | 0.97  | 1.00 | 0.97 | 1.00 |
| phylum "Elusimicrobia"           | 326                 | 0.97      | 0.98  | 0.98  | 0.94 | 0.98 | 0.95 |
| phylum "Fibrobacteres"           | 462                 | 0.96      | 0.96  | 0.98  | 0.96 | 0.98 | 0.96 |
| phylum "Fusobacteria"            | 10194               | 0.95      | 0.95  | 0.97  | 0.97 | 0.97 | 0.97 |
| phylum "Gemmatimonadetes"        | 2152                | 0.98      | 0.98  | 0.97  | 0.93 | 0.97 | 0.93 |
| phylum "Lentisphaerae"           | 1978                | 0.94      | 0.00  | 0.98  | 0.96 | 0.97 | 0.93 |
| phylum "Nitrospira"              | 2258                | 0.98      | 0.98  | 0.97  | 0.95 | 0.97 | 0.95 |
| phylum "Planctomycetes"          | 14348               | 0.81      | 0.01  | 0.93  | 0.94 | 0.93 | 0.91 |
| phylum "Proteobacteria"          | 454358              | 0.98      | 0.98  | 0.97  | 0.94 | 0.97 | 0.94 |
| phylum "Spirochaetes"            | 10644               | 0.92      | 0.92  | 0.97  | 0.86 | 0.97 | 0.79 |
| phylum "Synergistetes"           | 1649                | 0.98      | 0.98  | 0.97  | 0.94 | 0.97 | 0.94 |
| phylum "Tenericutes"             | 4064                | 0.94      | 0.94  | 0.93  | 0.96 | 0.93 | 0.93 |
| phylum "Thermodesulfobacteria"   | 166                 | 0.96      | 0.96  | 0.96  | 0.99 | 0.96 | 0.99 |
| phylum "Thermotogae"             | 777                 | 0.97      | 0.97  | 0.97  | 0.94 | 0.97 | 0.94 |
| phylum BRC1                      | 477                 | 0.94      | 0.94  | 0.96  | 0.97 | 0.96 | 0.97 |
| phylum OD1                       | 411                 | 0.68      | 0.00  | 0.00  | 0.88 | 0.00 | 0.84 |
| phylum OP11                      | 150                 | 0.21      | 0.01  | 0.27  | 0.00 | 0.27 | 0.00 |
| phylum SR1                       | 466                 | 0.95      | 0.96  | 0.97  | 0.97 | 0.97 | 0.97 |
| phylum TM7                       | 2596                | 0.97      | 0.97  | 0.00  | 0.88 | 0.00 | 0.81 |
| phylum WS3                       | 672                 | 0.96      | 0.98  | 0.97  | 0.97 | 0.97 | 0.97 |
| phylum "Armatimonadetes"         | 1576                | 0.29      | 0.05  | 0.97  | 0.91 | 0.97 | 0.91 |
| phylum "Verrucomicrobia"         | 12387               | 0.98      | 0.00  | 0.96  | 0.93 | 0.96 | 0.93 |
| phylum "Acidobacteria"           | 27092               | 0.98      | 0.97  | 0.98  | 0.95 | 0.98 | 0.95 |
| phylum Firmicutes                | 483681              | 0.97      | 0.96  | 0.97  | 0.96 | 0.97 | 0.96 |
| phylum Cyanobacteria/Chloroplast | 30775               | 0.93      | 0.93  | 0.98  | 0.95 | 0.98 | 0.91 |
| unclassified_Bacteria            | 50727               | 0.84      | 0.66  | 0.88  | 0.86 | 0.88 | 0.84 |
| domain Archaea                   | 78684               | 0.00      | 0.90  | 0.96  | 0.94 | 0.53 | 0.93 |
| phylum "Crenarchaeota"           | 20677               | 0.00      | 0.89  | 0.97  | 0.93 | 0.00 | 0.93 |
| phylum "Euryarchaeota"           | 41963               | 0.00      | 0.93  | 0.96  | 0.95 | 0.94 | 0.94 |
| phylum "Korarchaeota"            | 221                 | 0.00      | 0.93  | 0.95  | 0.93 | 0.29 | 0.94 |
| phylum "Nanoarchaeota"           | 138                 | 0.00      | 0.00  | 0.00  | 0.00 | 0.00 | 0.00 |
| phylum "Thaumarchaeota"          | 0                   | NA        | NA    | NA    | NA   | NA   | NA   |
| unclassified_Archaea             | 15685               | 0.00      | 0.85  | 0.96  | 0.93 | 0.16 | 0.93 |

| Primer Name       | Primer sequence       | Reference                                  |
|-------------------|-----------------------|--------------------------------------------|
| 341F (DegePrime)  | CCTACGGGNGGCWGCAG     | Herlemann, D. et al, ISMEj 2011; this work |
| 341'F (DegePrime) | CCTAHGGGRBGCAGCAG     | This work                                  |
| 515'F (DegePrime) | GTGBCAGCMGCCGCGGTAA   | This work                                  |
| 805R (DegePrime)  | GACTACHVGGGTATCTAATCC | Herlemann, D. et al, ISMEj 2011; this work |
| 515F (EMP)        | GTGCCAGCMGCCGCGGTAA   | Caporaso, J.G. et al, PNAS 2011            |
| 806R (EMP)        | GGACTACHVGGGTWCTAAT   | Caporaso, J.G. et al, PNAS 2011            |

**Supplementary table 1.** Taxonomic coverage of primers as deduced by the Probe Match tool in RDP (<http://rdp.cme.msu.edu/>). The search was conducted against release 11 update 1 of RDP and including only sequences spanning E.coli postions 300 to 850 and only including sequences with good quality scores.

| Primer sequence                           | Total 16S reads      |        | %matched relative to degenerate primer |        |
|-------------------------------------------|----------------------|--------|----------------------------------------|--------|
|                                           | Moose                | Marine | Moose                                  | Marine |
|                                           | 21233                | 20953  |                                        |        |
|                                           | <b>Matched reads</b> |        |                                        |        |
| <b>341F</b> CCTACGGG[ACTG]GGC[AT]GCAG     | 872                  | 2155   | 100                                    | 100    |
| CCTACGGG[A]GGC[A]GCAG                     | 837                  | 2079   | 95.99                                  | 96.47  |
| CCTACGGG[A]GGC[T]GCAG                     | 21                   | 12     | 2.41                                   | 0.56   |
| CCTACGGG[C]GGC[A]GCAG                     | 8                    | 8      | 0.92                                   | 0.37   |
| CCTACGGG[C]GGC[T]GCAG                     | 0                    | 1      | 0.00                                   | 0.05   |
| CCTACGGG[G]GGC[A]GCAG                     | 4                    | 20     | 0.46                                   | 0.93   |
| CCTACGGG[G]GGC[T]GCAG                     | 0                    | 1      | 0.00                                   | 0.05   |
| CCTACGGG[T]GGC[A]GCAG                     | 2                    | 27     | 0.23                                   | 1.25   |
| CCTACGGG[T]GGC[T]GCAG                     | 0                    | 7      | 0.00                                   | 0.32   |
| <b>515'F</b> GTG[TCG]CAGC[AC]GCCGCGGTAA   | 878                  | 2432   | 100                                    | 100    |
| GTG[C]CAGC[A]GCCGCGGTAA                   | 873                  | 2392   | 99.43                                  | 98.36  |
| GTG[C]CAGC[C]GCCGCGGTAA                   | 3                    | 6      | 0.34                                   | 0.25   |
| GTG[G]CAGC[A]GCCGCGGTAA                   | 2                    | 14     | 0.23                                   | 0.58   |
| GTG[G]CAGC[C]GCCGCGGTAA                   | 0                    | 5      | 0.00                                   | 0.21   |
| GTG[T]CAGC[A]GCCGCGGTAA                   | 0                    | 12     | 0.00                                   | 0.49   |
| GTG[T]CAGC[C]GCCGCGGTAA                   | 0                    | 3      | 0.00                                   | 0.12   |
| <b>805R</b> GGATTAGATACCC[CTG][AGT]GTAGTC | 764                  | 1287   | 100                                    | 100    |
| GGATTAGATACCC[C][A]GTAGTC                 | 10                   | 59     | 1.31                                   | 4.58   |
| GGATTAGATACCC[C][G]GTAGTC                 | 65                   | 48     | 8.51                                   | 3.73   |
| GGATTAGATACCC[C][T]GTAGTC                 | 0                    | 21     | 0.00                                   | 1.63   |
| GGATTAGATACCC[G][A]GTAGTC                 | 0                    | 11     | 0.00                                   | 0.85   |
| GGATTAGATACCC[G][G]GTAGTC                 | 4                    | 7      | 0.52                                   | 0.54   |
| GGATTAGATACCC[G][T]GTAGTC                 | 0                    | 0      | 0.00                                   | 0.00   |
| GGATTAGATACCC[T][A]GTAGTC                 | 16                   | 0      | 2.09                                   | 0.00   |
| GGATTAGATACCC[T][G]GTAGTC                 | 668                  | 1132   | 87.43                                  | 87.96  |
| GGATTAGATACCC[T][T]GTAGTC                 | 1                    | 9      | 0.13                                   | 0.70   |

**Supplementary table 2.** In silico matching of primer sequences to 16S sequence reads from the two shotgun metagenomes. Total 16S reads are all reads extracted with sortmeRNA. These 100 bp reads are distributed over the 16S gene, only a subset of them overlap with the primers. Matched reads are reads that perfectly match (forward or reverse complementary) to the primer.

## References

Herlemann DP, Labrenz M, Jurgens K, Bertilsson S, Waniek JJ, Andersson AF. 2011. Transitions in bacterial communities along the 2000 km salinity gradient of the Baltic Sea. *ISME J* 5:1571-1579.

Caporaso JG, Lauber CL, Walters WA, Berg-Lyons D, Lozupone CA, Turnbaugh PJ, Fierer N, Knight R. 2011. Global patterns of 16S rRNA diversity at a depth of millions of sequences per sample. *Proc Natl Acad Sci U S A* 108 Suppl 1:4516-4522.
